# Supplementary material for: Photosalient effect and photodimerization of mono- and dicationic organic salts incorporated in 4-styrylpyridine
Source: Royal Society of Chemistry journal article supplement (doi:10.1039/d4ce00538d), 2024-01-01
Supplement: d4ce00538d1.pdf [file d4ce00538d1.pdf]

SUPPLEMENTARY INFORMATION

**Photosalient Effect and Photodimerization of Mono- and Dicationic  
Organic Salts Incorporated in 4-Styrylpyridine**

Sotaro Kusumoto,<sup>a\*</sup> Kaede Wakabayashi,<sup>a</sup> Kenta Rakumitsu,<sup>b</sup> Yang Kim,<sup>c</sup> Yoshihiro Koide<sup>a\*</sup>

<sup>a</sup> Department of Applied Chemistry, Faculty of Chemistry and Biochemistry, Kanagawa University, 3-27-1 Rokkakubashi, Kanagawa-ku, Yokohama 221-8686, Japan.

<sup>b</sup> Graduate School of Pharmaceutical Sciences, Chiba University, 1-8-1 Inohana, Chuo-ku, Chiba 260-8675, Japan.

<sup>c</sup> Department of Chemistry, Graduate School of Science and Technology, Kumamoto University, 2-39-1 Kurokami, Chuo-ku, Kumamoto 860-8555, Japan.

Corresponding author: S. Kusumoto, Y. Koide  
E-mail: [kusumoto@kanagawa-u.ac.jp](mailto:kusumoto@kanagawa-u.ac.jp); [ykoide01@kanagawa-u.ac.jp](mailto:ykoide01@kanagawa-u.ac.jp)

## Reagents

All reagents and solvents were purchased from Tokyo Kasei Co. and Wako Pure Chemical Industries and used without further purification. Compounds **1** and **2** were prepared following the previous method, with minor modifications.[ref 8 in the main text]

## Preparation of single crystal

### (*E*)-1-benzyl-4-styrylpyridin-1-ium bromide ([*bsp*]Br) (**1**)

4-Styrylpyridine (1.0 mmol) and benzyl bromide (1.0 mmol) were dissolved in acetonitrile (100 mL) in an amber glass flask and stirred at 60 °C for 1 day. The resulting solution was then cooled to ambient temperature, forming colorless plate-like crystals. Yield, 0.27 g (97%).

### 1,1'-((2,3,5,6-tetramethyl-1,4-phenylene)bis(methylene))bis(4-((*E*)-styryl)pyridin-1-ium) dibromide, ([*tpbmbsp*]Br<sub>2</sub>) (**2**)

4-Styrylpyridine (1.0 mmol) and 1,4-bis(bromomethyl)-2,3,5,6-tetramethylbenzene (0.50 mmol) were dissolved in acetonitrile (100 mL) in an amber glass flask and stirred at 70 °C for 1 day. After the solution was cooled to ambient temperature and left to stand for 1 week, pale-yellow block-like crystals were obtained. Yield, 0.18 g (70 %).

*Anal.* calc. for C<sub>38</sub>H<sub>44</sub>Br<sub>2</sub>N<sub>2</sub>O<sub>3</sub>: C, 61.96; H, 6.02; N, 3.80%. Found: C, 62.03; H, 6.39; N, 3.50%.

## 1\_UV

After exposing powder **1** to UV light for 4 hours, it was dissolved in a methanol solution with a drop of *c*-HBr and allowed to evaporate slowly to give block-like crystals suitable for single-crystal structural analysis.

## 2\_UV

The photodimerized crystals **2\_UV** were prepared and crystallized under natural light.

## Physical measurements

<sup>1</sup>H NMR spectra were measured using a JEOL400 MHz spectrometer in DMSO-*d*<sub>6</sub>. Elemental analyses were performed on an Elementar Vario Micro Cube analyzer. Single-crystal X-ray diffraction data was collected with a XtaLAB Synergy Custom. The structures were solved by direct methods (SHELXT<sup>1</sup>) and refined by full-matrix least-squares refinement using the SHELXL<sup>2</sup> program. Hydrogen atoms were refined geometrically using a riding model. □ In the crystallographic determination of compound **2**, it was impossible to determine satisfactory coordinates for the hydrogen atoms at water oxygen O2. Crystallographic data are summarized in Table S1. Powder X-ray diffraction data (PXRD) were collected on a RIGAKU RINT-UltimaIII (40 kV/40 mA) X-ray diffractometer using Cu K $\alpha$  radiation ( $\lambda = 1.5406 \text{ \AA}$ ) in the 2 $\theta$  range of 2–30° with a step width of 1.0°. Electronic absorption spectra in the solid state were measured using a V650 spectrometer (JASCO). The photosalient of crystals were recorded using a SHODENSHA digital camera.

## Supplementary data

Table S1. Crystallographic data

| Compound                                            | 1                                                              | 1_UV                                                                          | 2                                                                                | 2_UV                                                           |
|-----------------------------------------------------|----------------------------------------------------------------|-------------------------------------------------------------------------------|----------------------------------------------------------------------------------|----------------------------------------------------------------|
| formula                                             | C <sub>20</sub> H <sub>18</sub> Br <sub>1</sub> N <sub>1</sub> | C <sub>40</sub> H <sub>40</sub> Br <sub>2</sub> N <sub>2</sub> O <sub>2</sub> | C <sub>38</sub> H <sub>41</sub> Br <sub>2</sub> N <sub>2</sub> O <sub>1.50</sub> | C <sub>76</sub> H <sub>76</sub> Br <sub>4</sub> N <sub>4</sub> |
| formula weight                                      | 352.26                                                         | 740.56                                                                        | 709.55                                                                           | 1365.04                                                        |
| crystal system                                      | triclinic                                                      | triclinic                                                                     | triclinic                                                                        | triclinic                                                      |
| space group                                         | <i>P</i> -1                                                    | <i>P</i> -1                                                                   | <i>P</i> -1                                                                      | <i>P</i> -1                                                    |
| <i>a</i> / Å                                        | 6.8963(2)                                                      | 9.6895(3)                                                                     | 12.1902(4)                                                                       | 12.2770(5)                                                     |
| <i>b</i> / Å                                        | 10.2829(3)                                                     | 9.7559(4)                                                                     | 15.9154(5)                                                                       | 16.0596(7)                                                     |
| <i>c</i> / Å                                        | 12.8595(4)                                                     | 10.9467(3)                                                                    | 18.7119(7)                                                                       | 18.7305(15)                                                    |
| $\alpha$ / °                                        | 76.412(3)                                                      | 97.487(3)                                                                     | 69.469(3)                                                                        | 68.905(6)                                                      |
| $\beta$ / °                                         | 83.264(2)                                                      | 105.034(3)                                                                    | 73.203(3)                                                                        | 71.723(6)                                                      |
| $\gamma$ / °                                        | 70.536(3)                                                      | 118.199(4)                                                                    | 89.616(3)                                                                        | 89.945(3)                                                      |
| <i>V</i> / Å <sup>3</sup>                           | 834.98(5)                                                      | 840.99(6)                                                                     | 3236.5(2)                                                                        | 3245.5(4)                                                      |
| <i>Z</i>                                            | 2                                                              | 1                                                                             | 4                                                                                | 2                                                              |
| <i>T</i> / K                                        | 120                                                            | 120                                                                           | 120                                                                              | 120                                                            |
| <i>R</i> <sub>1</sub> [ <i>I</i> > 2σ( <i>I</i> )]  | 0.0371                                                         | 0.0340                                                                        | 0.0615                                                                           | 0.1046                                                         |
| <i>wR</i> <sub>2</sub> [ <i>I</i> > 2σ( <i>I</i> )] | 0.0820                                                         | 0.0724                                                                        | 0.1396                                                                           | 0.2462                                                         |
| <i>R</i> <sub>1</sub> (all data)                    | 0.0484                                                         | 0.0415                                                                        | 0.0960                                                                           | 0.1792                                                         |
| <i>wR</i> <sub>2</sub> (all data)                   | 0.0852                                                         | 0.0747                                                                        | 0.1577                                                                           | 0.2908                                                         |
| G.O.F.                                              | 1.192                                                          | 1.055                                                                         | 1.044                                                                            | 1.026                                                          |
| CCDC                                                | 2358683                                                        | 2358684                                                                       | 2358685                                                                          | 2358686                                                        |

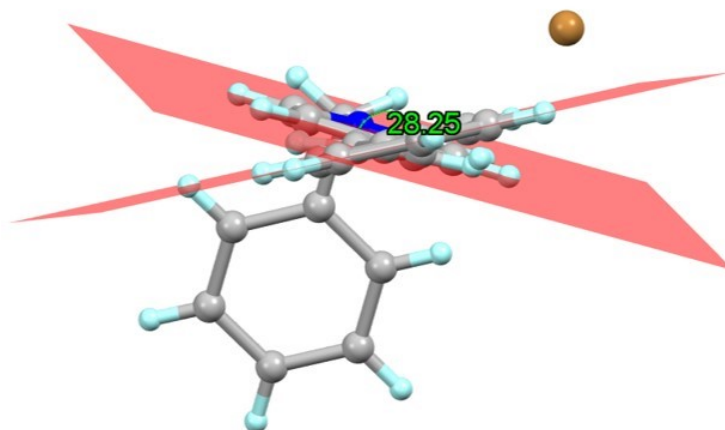

**Fig. S1** Dihedral angle of **1** between pyridinium and the benzene in the 4spy moiety.

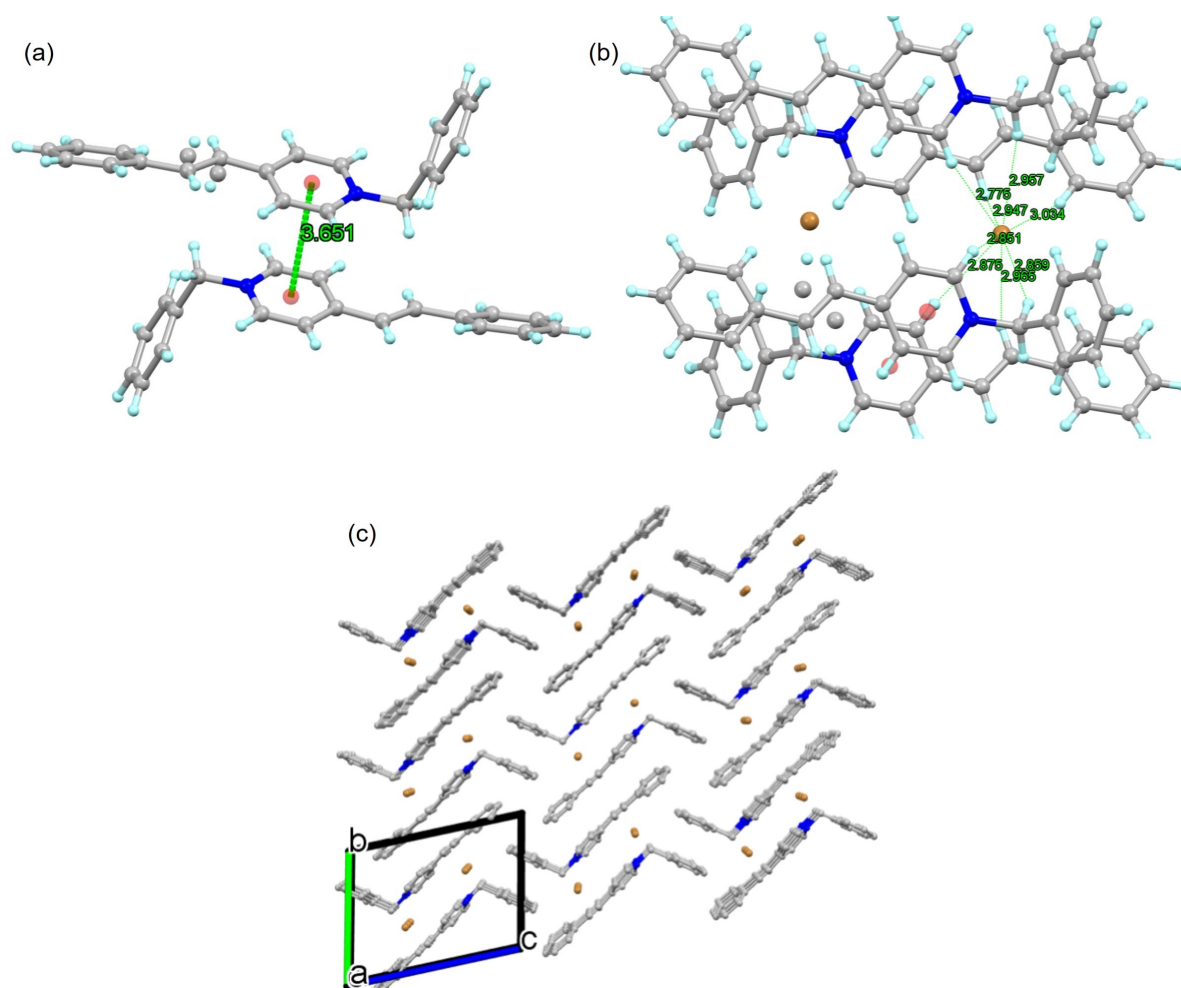

**Fig. S2** (a)  $\pi$ --- $\pi$  interactions between pyridinium rings in crystal **1**. (b) Intermolecular interactions around a bromide ion in crystal **1**. (c) Packing structure of crystal **1** viewed down  $a$ -axis.

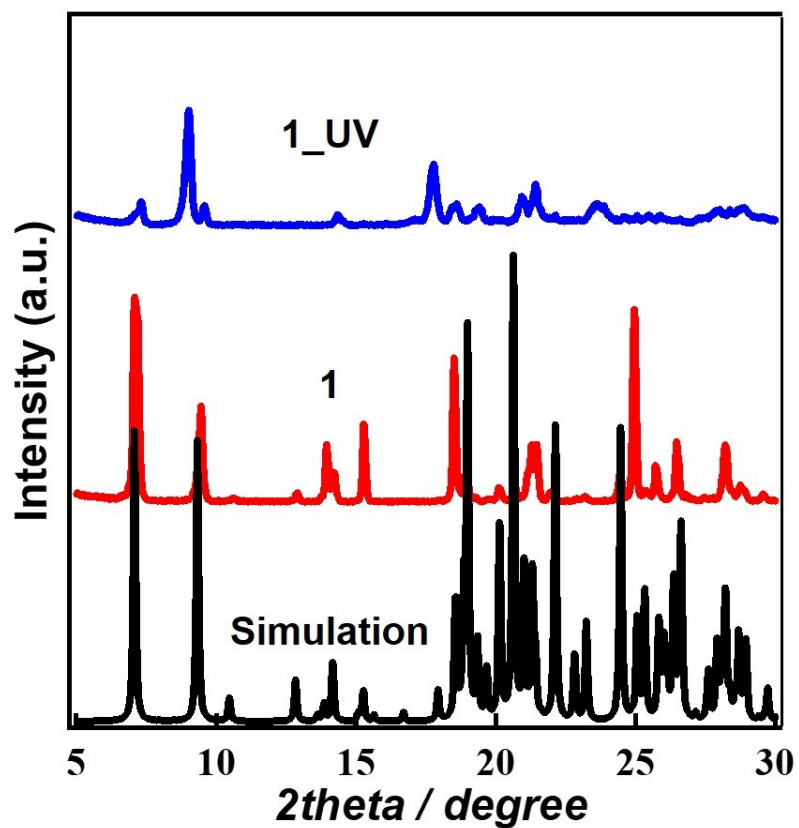

Fig. S3 Powder X-ray diffraction pattern of compound 1.

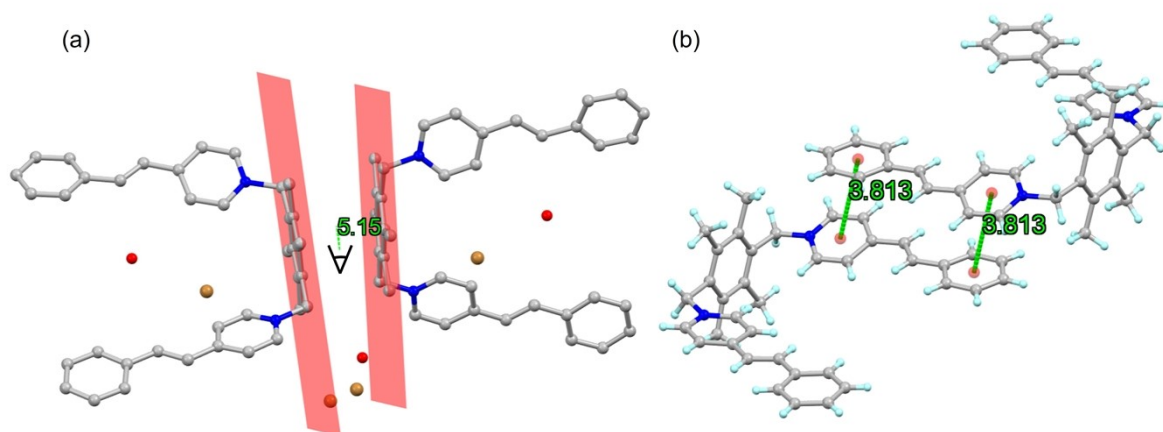

Fig. S4 Crystal structure of 2. (a) The durenium moieties have slightly oblique  $\pi$ --- $\pi$  interactions with a dihedral angle of  $5.15^\circ$  to the adjacent ones. (b) The styrylpyridinium moieties are stacked head-to-tail with the adjacent ones, resulting in  $\pi$ --- $\pi$  interactions between pyridinium and benzene.

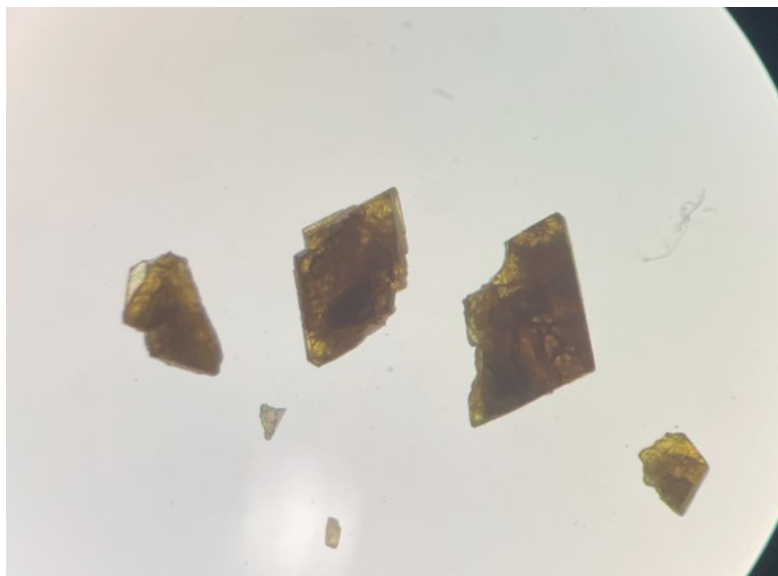

Fig. S5 Crystal image of **2** under microscope.

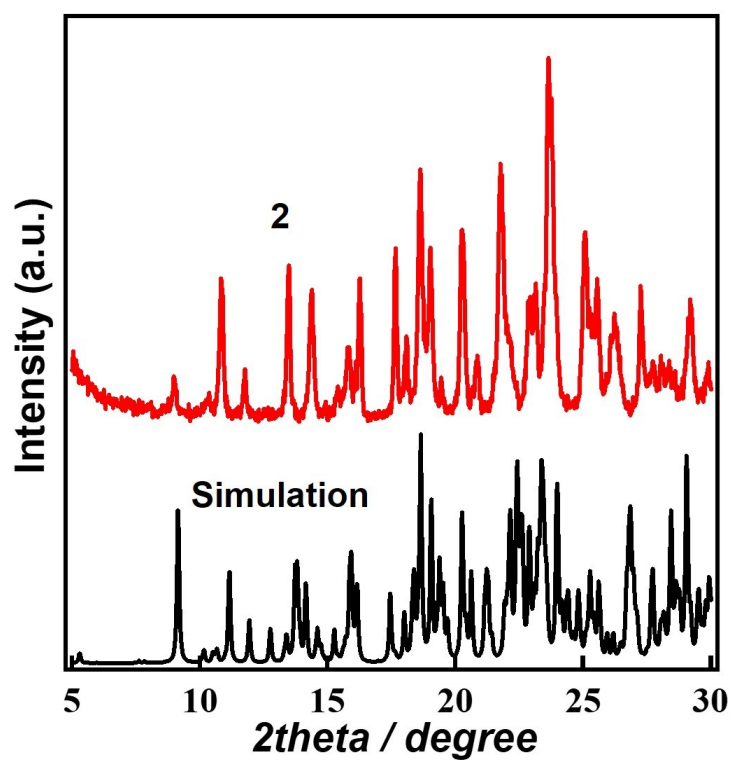

Fig. S6 Powder X-ray diffraction pattern of compound **2**.

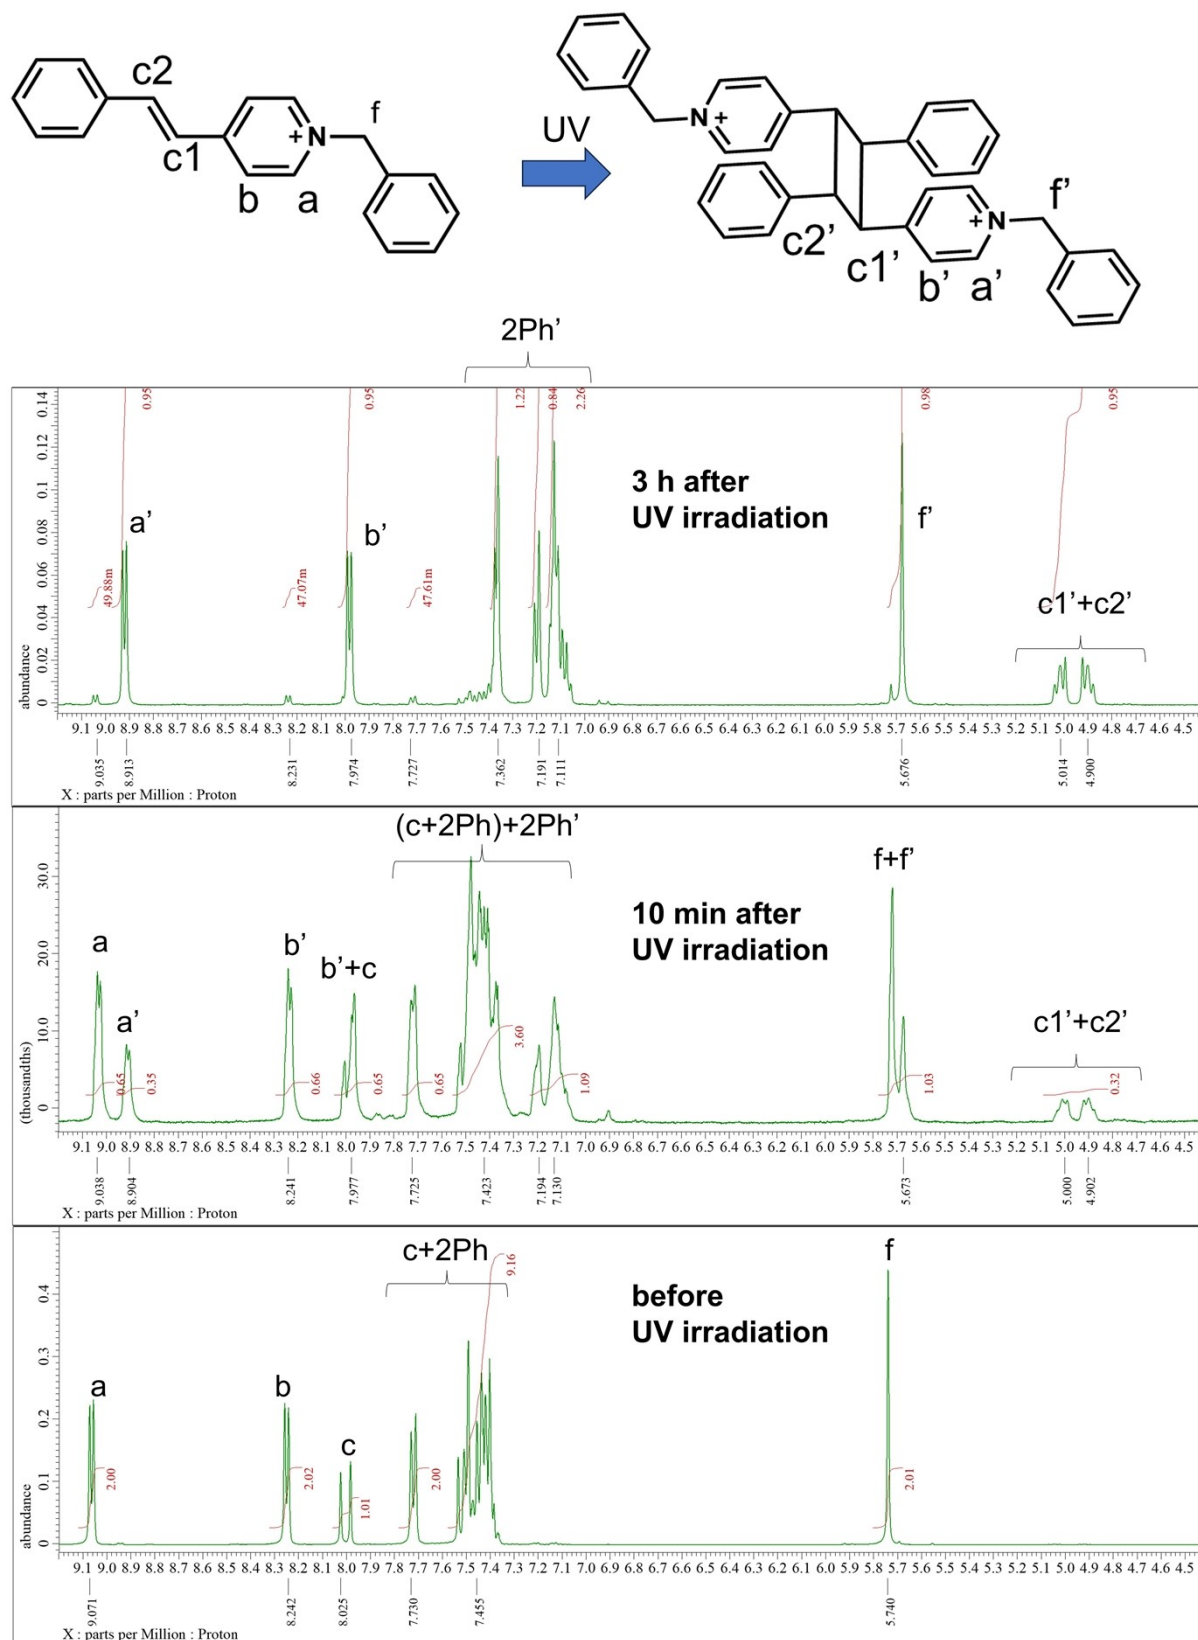

**Fig. S7**  $^1\text{H}$  NMR spectra of **1** before and after exposure to UV light for 10 min and 180 minutes.

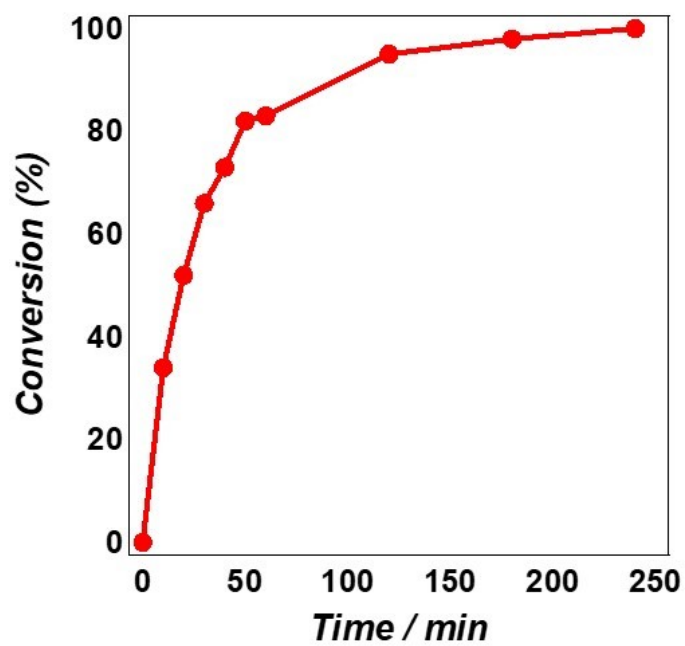

**Fig. S8** Percentage of time-dependent photodimerization conversion under UV light exposure for **1**.



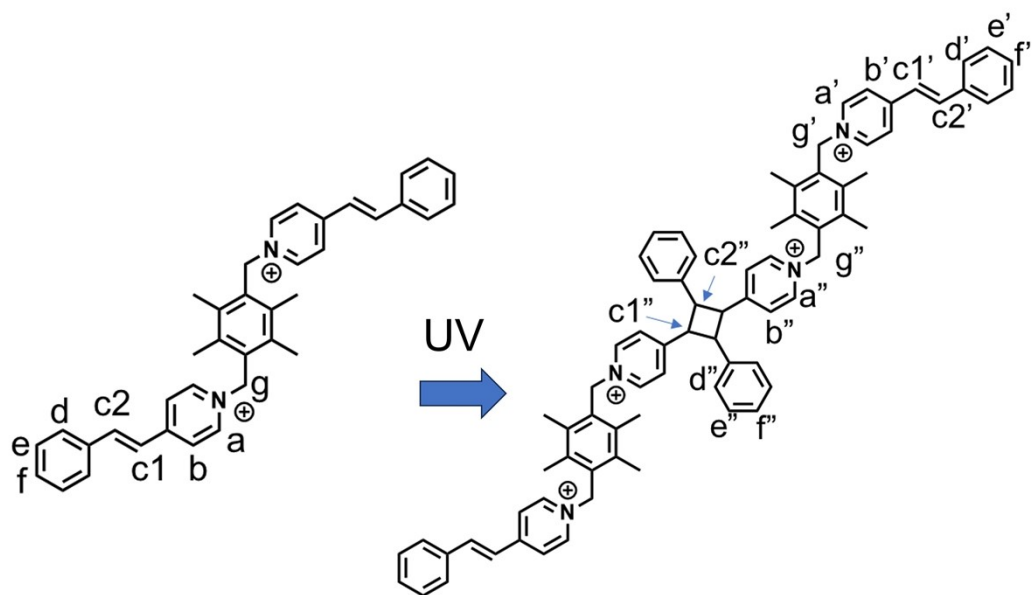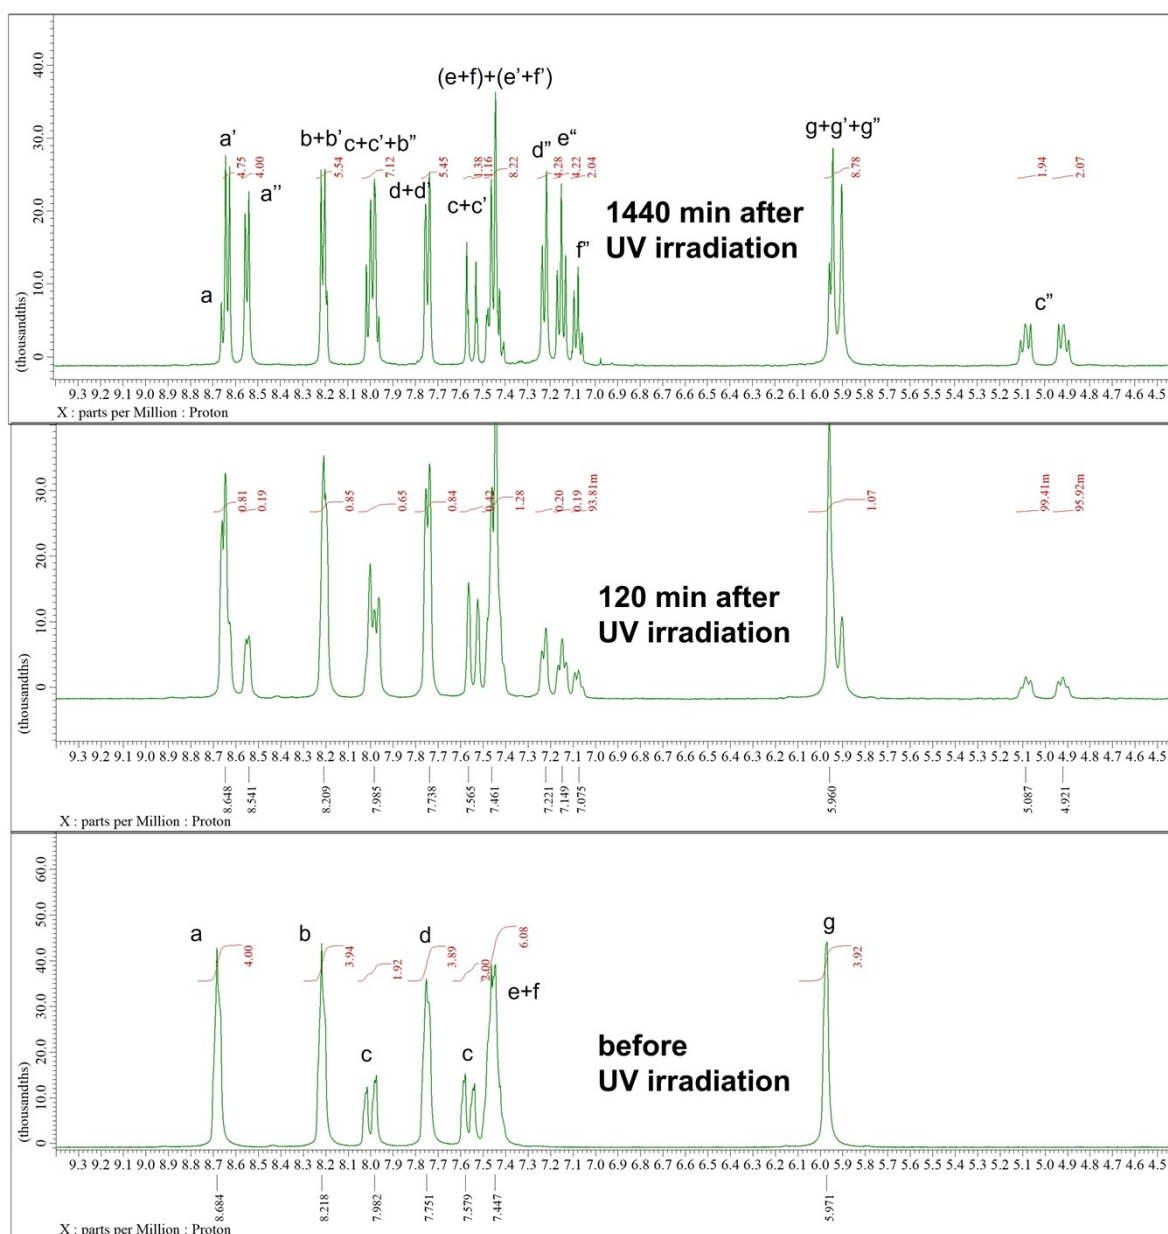

Fig. S9  $^1\text{H}$  NMR spectra of **2** before and after exposure to UV light for 120 and 1440 minutes.

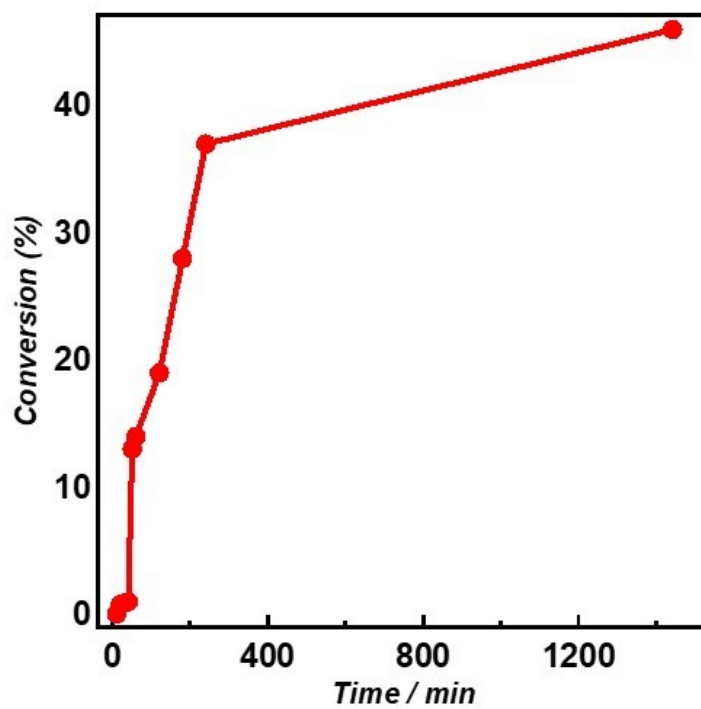

Fig. S10 Percentage of time-dependent photodimerization conversion of olefin under UV light exposure for **2**.

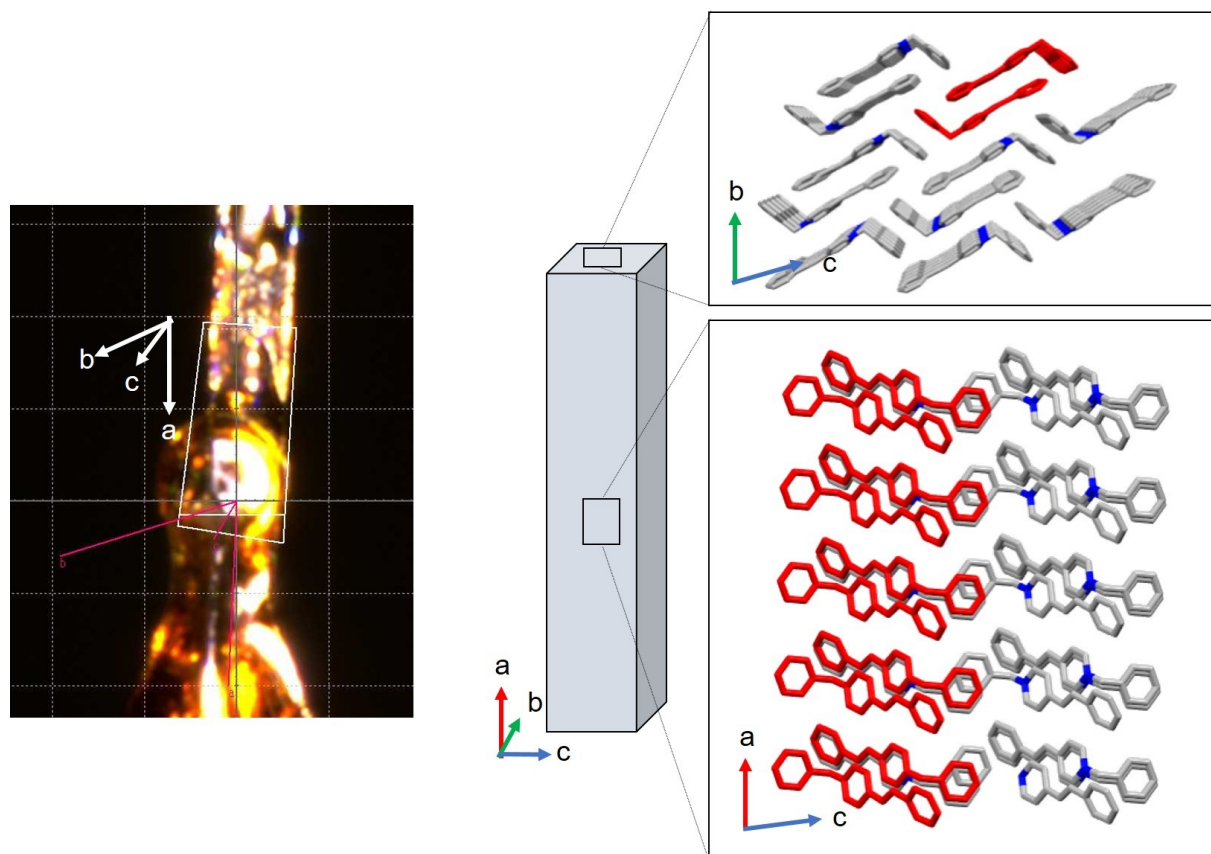

**Fig. S11** Face index of **1** and its corresponding integrated structure. Bromide ions are omitted for clarity.

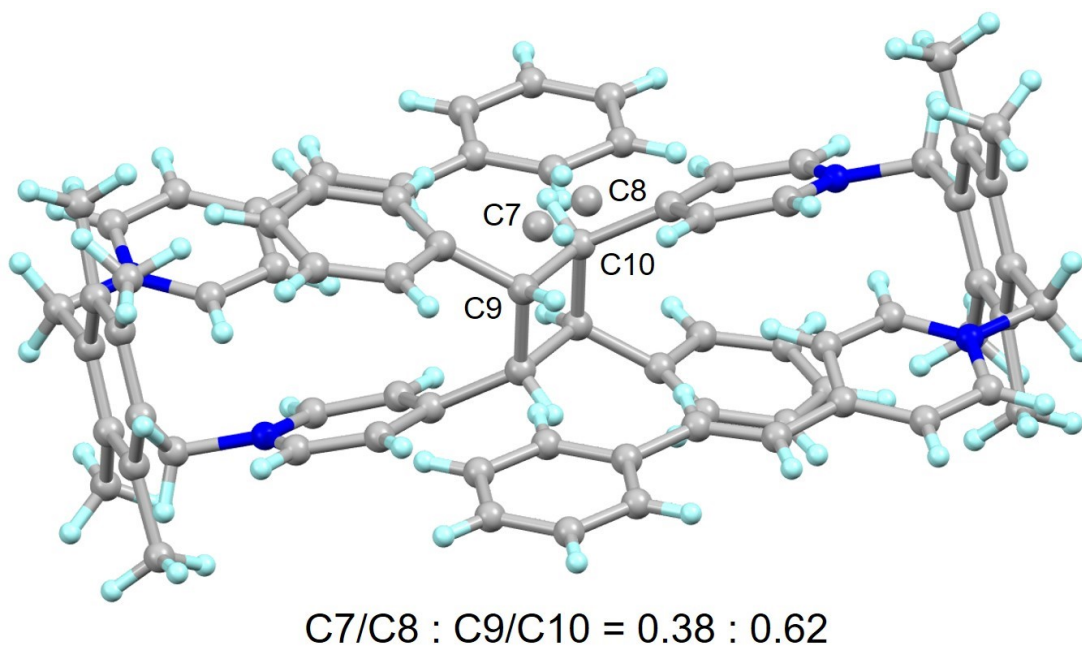

**Fig. S12** Disordered bonds of **2\_UV** between C7/C8 and C9/C10 and their ratios. C7/C8 indicates unreacted C=C bonds.

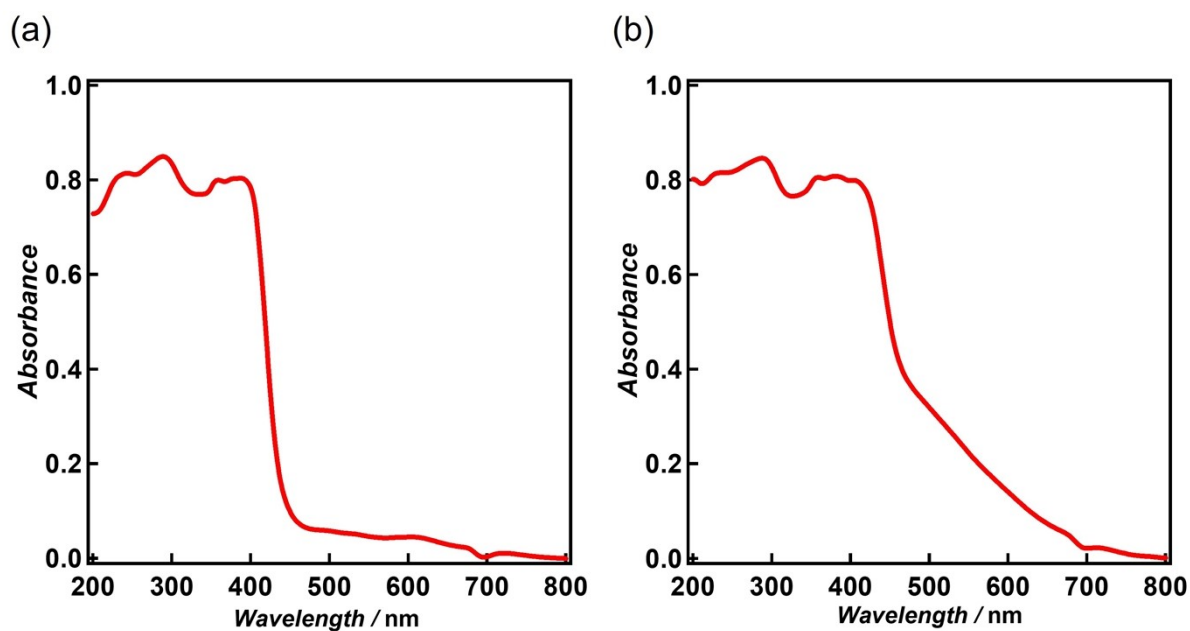

**Fig. S13** UV spectra in the solid state for compounds **1** (a) and **2** (b)

## References

1. G. M. Sheldrick, SHELXT – Integrated Space-Group and Crystal-Structure Determination, *Acta Crystallogr., Sect. A: Found. Adv.*, 2015, **71**, 3–8.
2. G. M. Sheldrick, Crystal Structure Refinement with SHELXL. *Acta Crystallogr Sect. C* 2015, **71**, 3–8.
